# Supplementary material for: A heuristic algorithm solving the mutual-exclusivity-sorting problem
Source: PubMed Central journal article supplement (PMC9857977; doi:10.1093/bioinformatics/btad016), 2023-01-12
Supplement: btad016_supplementary_data.pdf [file btad016_supplementary_data.pdf]

**Algorithm**      Heuristic Mutual Exclusivity Sorting

**Input:**            BM:  $n \times m$  binary matrix  
**Output:**          BM': Sorted  $n \times m$  binary matrix

**Procedure**      HeuristicMutExSorting(BM)

uncoveredGenes = 1:n

uncoveredSamples = 1:m

**while** uncoveredGenes > 0 AND uncoveredSamples > 0

    bm = BM[uncoveredGenes, uncoveredSamples]

    bestInClass = findBestInClass(bm)

**if** uncoveredGenes > 1 **then**

        sortedRows = bestInClass

**else**

        sortedRows = concatenate(sortedRows, bestInClass)

**end if**

    uncoveredGenes = diff(uncoveredGenes, sortedRows)

    uncoveredSamples = diff(uncoveredSamples, columns(bm[bestInClass,] != 0))

**end while**

sortedRows = concatenate(sortedRows, uncoveredGenes)

sortedColumns = rearrangeMatrix(B, sortedRows)

BM' = BM[sortedRows, sortedColumns]

**return** BM'

**end procedure**

**Procedure**      findBestInClass(bm)

exclusiveCoverage = sum(2 \* bm - columnSum(bm))

g = argmax<sub>g ∈ rows(bm)</sub> (exclusiveCoverage)

**return** g

**end procedure**

**Procedure**      rearrangeMatrix(BM, sortedRows)

remainingSamples = 1:m

columnOrder = init vector

**for** g in sortedRows

    samples = sort.decreasing(2 \* BM[g,] - columnSum(BM))

    columnOrder = concatenate(columnOrder, columns(BM[g, samples] != 0))

    remainingSamples = diff(remainingSamples, columnOrder)

**end for**

**return** columnOrder

**end procedure**
